# Supplementary material
Source: PubMed Central journal article supplement (PMC8753565)
Supplement: mmc1.pdf [file mmc1.pdf]

## **Supplemental Information**

### **Prediction and validation of hematopoietic stem and progenitor cell off-target editing in transplanted rhesus macaques**

**Aisha A. AlJanahi, Cicera R. Lazzarotto, Shirley Chen, Tae-Hoon Shin, Stefan Cordes, Xing Fan, Isabel Jabara, Yifan Zhou, David J. Young, Byung-Chul Lee, Kyung-Rok Yu, Yuesheng Li, Bradley Toms, Ilker Tunc, So Gun Hong, Lauren L. Truitt, Julia Klermund, Geoffroy Andrieux, Miriam Y. Kim, Toni Cathomen, Saar Gill, Shengdar Q. Tsai, and Cynthia E. Dunbar**

**Figure S1. Overlap between CIRCLE-seq technical replicates for *TET2* and *CD33* gRNAs.**

**A.**

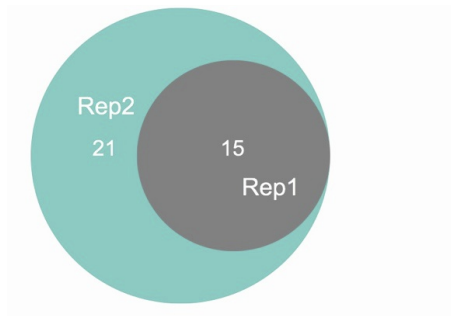

**B.**

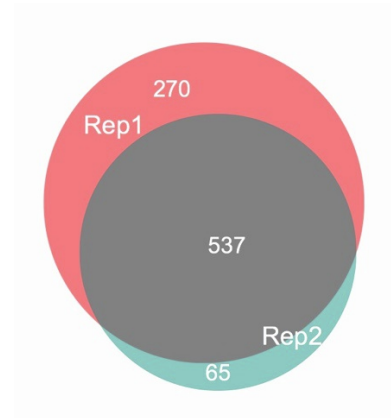

**Figure S1.** A) Overlap between the off-target sites predicted by the *TET2* CIRCLE-Seq technical replicates performed on animal ZL26. B) Overlap between the off-target sites predicted by the *CD33* CIRCLE-seq technical replicates performed on animal ZJ52.

**Figure S2. Schematic of autologous HSPC editing in the rhesus macaque model.**

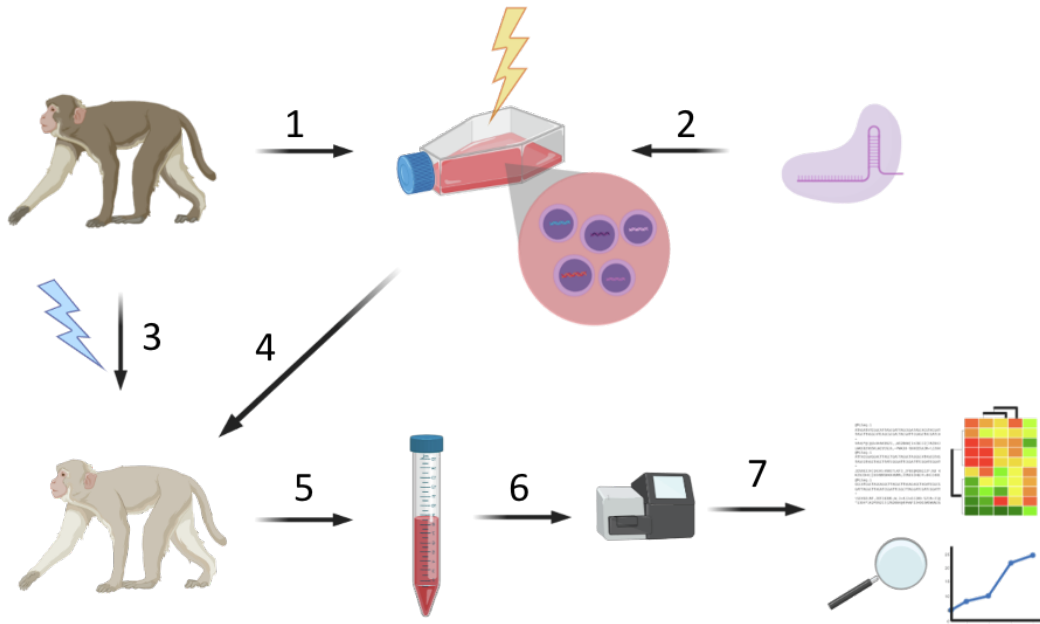

**Figure S2.** CD34<sup>+</sup> cells mobilized into the blood with G-CSF and plerixafor are collected from the animal via apheresis and purified via immunoabsorption. 2- the collected cells are electroporated with Cas9+gRNA RNP complexes to create the infusion product. 3- the animal is given total body irradiation (500 rads X 2) to empty bone marrow niches facilitating engraftment of the edited HSPCs. 4- the edited cells are transplanted into the animal via intravenous infusion. 5- the infused HSPCs home to the bone marrow and begin producing daughter cells that differentiate and are released into the peripheral blood, which can be sampled and lineage-purified at different time points. 6- DNA from cells collected at different time points can be sequenced to search for editing at on-target and off-target sites. 7- sequencing output is analyzed to look for valid on-target and off-target editing.

**Figure S3. Selection of the *CD33* off-target sites for the custom AmpliSeq HD sequencing panel.**

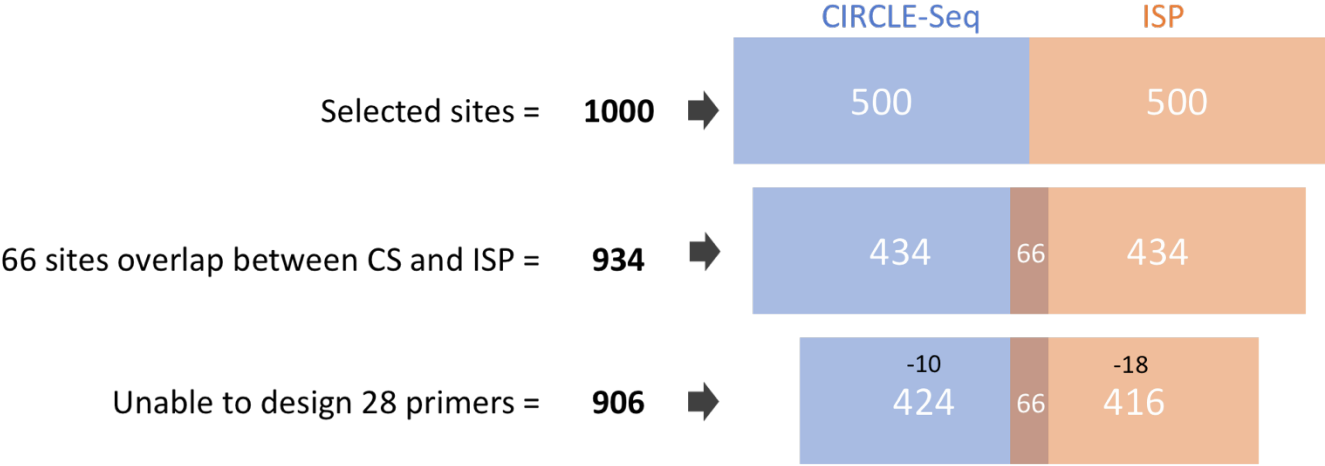

**Figure S3.** Distribution of the *CD33* off-target sites selected for AmpliSeq HD sequencing.

**Figure S4. Editing patterns in the 19 *bona fide* CD33 off-target sites.**

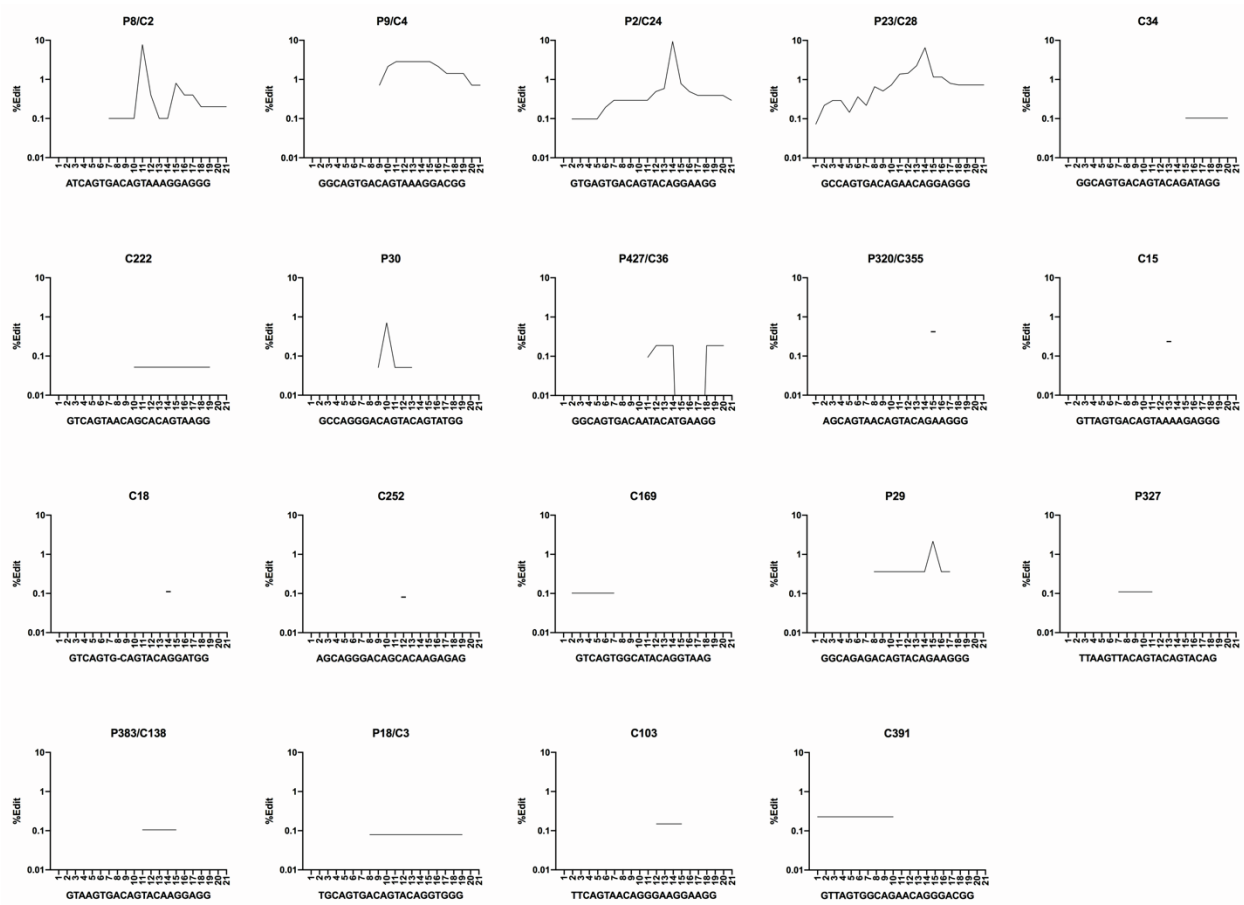

**Figure S4.** Percent editing in each position of the 21 bps complementary to the *CD33* gRNA shown on a log scale. The editing percent is shown only for the highest edited sample for each of the 19 edited off-target sites. If the INDEL was an insertion, then the nucleotide previous to the insertion site is represented. If the INDEL was a deletion, then all deleted nucleotides are represented. All 19 sites showed no detectable variation from the reference in the un-edited samples.

Figure S5. Average % edit for each *bona fide* off-target site in the 40 sequenced samples.

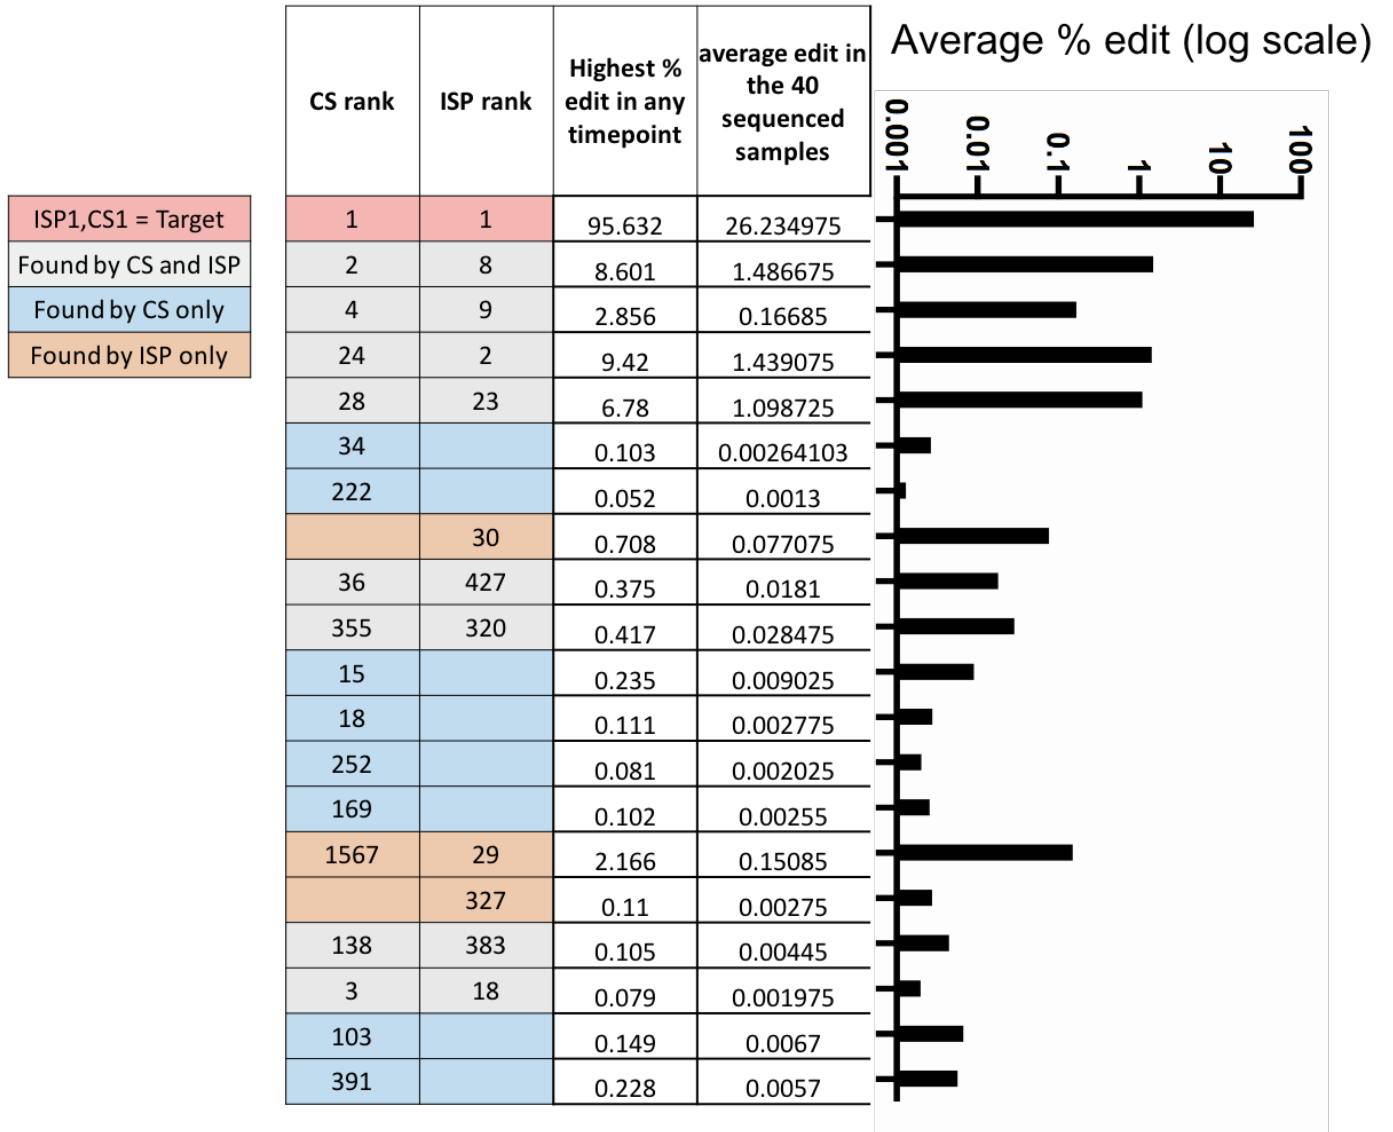

Figure S6. Rank of validated off-target sites via CIRCLE-Seq and ISP.

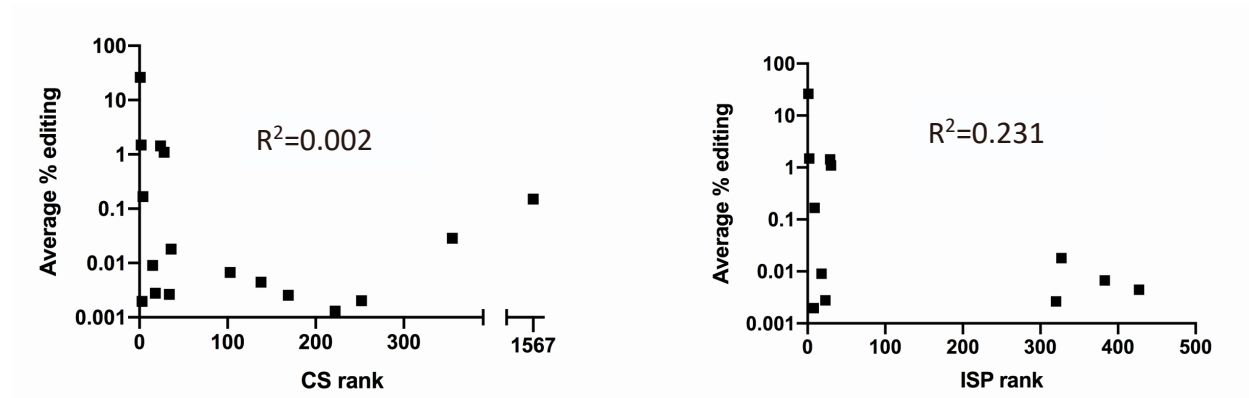

Figure S6. Dot plots showing the rank of each of the valid off-target sites predicted by each method on the X axis, and the average percent edit (log scale) for each of *the* off-target sites in all 40 sequenced samples on the Y axis.

Table S1. Top 20 edited reads in the infusion product of ZL52 at site ZJ52-CS2/ISP8.

ZJ52-CS2/ISP8

overall edit rate = 5.1

|          | Aligned sequence                                | %Reads        |
|----------|-------------------------------------------------|---------------|
| Unedited | <b>CGCCTCTTCTGTTTCCCTCCTTTACTGTCACTGATTGCAC</b> | <b>92.958</b> |
| 1        | CGCCTCTTCTGTTTCCCTCCTTTACTGTCACTGATTGCAC        | 2.438         |
| 2        | CGCCTCTTCTGTTTCCCTCGTTACTGTCACTGATTGCAC         | 0.557         |
| 3        | CGCCTCTTCTGTTTCCCTC-----CTGTCACTGATTGCAC        | 0.146         |
| 4        | CGCCTCTTCTGTTTCCCTCGTTACTGTCACTGATTGCAC         | 0.124         |
| 5        | CGCCTCTTCTGTTTCCCT-----CTGTCACTGATTGCAC         | 0.122         |
| 6        | CGCCTCTTCTGTTTCC-----CTGTCACTGATTGCAC           | 0.082         |
| 7        | CGCCTCTTCTGTTTCCCTCTTTACTGTCACTGATTGCAC         | 0.071         |
| 8        | CGCCTCTTCTG-----TTTACTGTCACTGATTGCAC            | 0.068         |
| 9        | CGCCTCTTCTGTTTCC-----CTGATTGCAC                 | 0.060         |
| 10       | CGCCTCTTCTG-----TTACTGTCACTGATTGCAC             | 0.055         |
| 11       | CGCCTCTTCTGTTTCCCTC-----CTGATTGCAC              | 0.053         |
| 12       | CGCCTCTTCTGTTTCCCTCCTGTCACTGTCACTGATTGCAC       | 0.047         |
| 13       | CGCCTCTT-----CTGTCACTGATTGCAC                   | 0.046         |
| 14       | CGCCTCTTCTGT-----TTTACTGTCACTGATTGCAC           | 0.043         |
| 15       | CGCCTC-----TTACTGTCACTGATTGCAC                  | 0.035         |
| 16       | CGCCTCTTCTGTTTCCC-----TTACTGTCACTGATTGCAC       | 0.033         |
| 17       | CGCCT-----CTGTCACTGATTGCAC                      | 0.028         |
| 18       | CGCCTCTTCTGTTTCCC-----TACTGTCACTGATTGCAC        | 0.028         |
| 19       | CGCCTCTTCTGTTTCCCTCCTTA TACTGTCACTGATTGCAC      | 0.027         |
| 20       | CGCCTCTTCTGTTTCC-----CTTTACTGTCACTGATTGCAC      | 0.025         |

Expected cut site



Table S2. Top 20 edited reads in the infusion product of ZL52 at site ZJ52-CS4/ISP9.

ZJ52-CS4/ISP9

overall edit rate = 1.1

| Unedited | Aligned sequence                                                | %Reads        |
|----------|-----------------------------------------------------------------|---------------|
|          | <b>GCTACAGCCAAATGCCGTCC</b> <b>TTTACTGTC</b> <b>ACTGCCATGGC</b> | <b>94.861</b> |
| 1        | GCTACAGCCAAATGCCGTCC <b>T</b> TTTACTGTCACTGCCATGGC              | 0.671         |
| 2        | GCTACAGCCAAATGCCGTCC--TACTGTCACTGCCATGGC                        | 0.055         |
| 3        | GCTACAGCCAAATGCCGTCC-TTACTGTCACTGCCATGGC                        | 0.055         |
| 4        | GCTACAGCCAAATGCCGT-C <b>TTTACTGTC</b> ACTGCCATGGC               | 0.036         |
| 5        | GCTACAGCCAAATGCCGT <b>CAGAAA</b> TACTGTCACTGCCATGGC             | 0.035         |
| 6        | GCTACAGCCAAATGCCGTCC <b>T-----</b> CCTGCCATGGC                  | 0.034         |
| 7        | GCT <b>-----</b> TTTACTGTCACTGCCATGGC                           | 0.030         |
| 8        | GCTACAGCCAAATGCCG <b>----</b> TTTACTGTCACTGCCATGGC              | 0.021         |
| 9        | GCTACAGCC <b>-AATGCCGTCC</b> TTTACTGTCACTGCCATGGC               | 0.019         |
| 10       | GCTACAGCCAAATGCC <b>-----</b> GTCACTGCCATGGC                    | 0.018         |
| 11       | GCTACAGCCAAATGCCGTCC <b>T</b> TTTACTGTCACTGCC <b>T</b> GGC      | 0.011         |
| 12       | GCTACAGCCAAATGCCGTCC <b>TTTACTGTC</b> ACTGCCAT <b>-GC</b>       | 0.005         |
| 13       | GCTACAGCCAAATGCCGTCC <b>TTTACTGTC</b> ACTG <b>-CAT</b> GGC      | 0.004         |
| 14       | GCTACAGCC <b>AAAATGCCGTCC</b> TTTACTGTCACTGCCATGGC              | 0.003         |
| 15       | <b>-CTACAGCCAAATGCCGTCC</b> TTTACTGTCACTGCCATGGC                | 0.002         |
| 16       | GCTACAGCCAAATGCC <b>-TCC</b> TTTACTGTCACTGCCATGGC               | 0.002         |
| 17       | GCTACAGCCAAATGCCGTCC <b>TTT-CTG</b> TACTGCCATGGC                | 0.002         |
| 18       | GCTACAGCCAAATGCCGTCC <b>TTTTACTGTC</b> ACTGCCATGA               | 0.002         |
| 19       | CTACAGCCAAAT <b>GCCGTCC</b> TTTACTGTCACTGCCATGGC                | 0.002         |
| 20       | GCTACAGTCAAATGCCGTCC <b>TTTTACTGTC</b> ACTGCCATGG               | 0.001         |

↓  
Expected cut site

Table S3. Top 20 edited reads in the infusion product of ZL52 at site ZJ52-CS26/ISP2.

ZJ52-CS26/ISP2

overall edit rate = 8.3

| Unedited | Aligned sequence                                            | %Reads        |
|----------|-------------------------------------------------------------|---------------|
|          | <b>AAATCTCACTCTCTCCTTCC</b> TGTACTGTCAC <b>TCACTGTAC</b>    | <b>90.412</b> |
| 1        | AAATCTCACTCTCTCCTTCC <b>T</b> TGTACTGTCAC <b>TCACTGTAC</b>  | 5.459         |
| 2        | AAATCTCACTCTCTCCTTC-----CTGTCAC <b>TCACTGTAC</b>            | 0.224         |
| 3        | AAATCTCACTCTCTCCTTC-----CTCACTGTAC                          | 0.156         |
| 4        | AAATCTCACTCTCTCCTTCC--TACTGTCAC <b>TCACTGTAC</b>            | 0.151         |
| 5        | AAATC-----TCACTCACTGTAC                                     | 0.127         |
| 6        | AAATCTCACTCTCTCCTTCC <b>T</b> -----CTGTCAC <b>TCACTGTAC</b> | 0.118         |
| 7        | AAATCTCACTCTCTCCTT <b>C</b> TGTACTGTCAC <b>TCACTGTAC</b>    | 0.091         |
| 8        | AAATCTCACTCTCTCCTTCC <b>T</b> -----TCACTGTAC                | 0.081         |
| 9        | AAATCTCACTCTCTCCTTCC <b>T</b> -----                         | 0.076         |
| 10       | AAATCTCACTCTCTCC-----TACTGTCAC <b>TCACTGTAC</b>             | 0.070         |
| 11       | AAATCTCACTCTCTC-----ACTGTCAC <b>TCACTGTAC</b>               | 0.064         |
| 12       | AAATCTCACTCTCTC-----CTGTCAC <b>TCACTGTAC</b>                | 0.064         |
| 13       | AAATCTCACTCTCTCCTTCC <b>T</b> -----TGTCAC <b>TCACTGTAC</b>  | 0.063         |
| 14       | AAATCTCACTCTCTCCTTCC <b>T</b> -----ACTGTAC                  | 0.060         |
| 15       | AAATCTCACTCTCTCCTTCC <b>T</b> TACTGTCAC <b>TCACTGTAC</b>    | 0.055         |
| 16       | AAATCTCACTCTC-----TAC                                       | 0.053         |
| 17       | AA-----ACTGTCAC <b>TCACT-TAC</b>                            | 0.050         |
| 18       | AAATCTCACTCTCTCCTTCC-----TCACTCACTGTAC                      | 0.049         |
| 19       | AAATCTCACTCTC-----TCACTCACTGTAC                             | 0.047         |
| 20       | AAATCTCACTCTCTC-----CACTGTAC                                | 0.046         |

Expected cut site

Table S4. Top 20 edited reads in the infusion product of ZL52 at site ZJ52-CS10.

ZJ52-CS10

overall edit rate = 1.4

|          | Aligned sequence                                | %Reads        |
|----------|-------------------------------------------------|---------------|
| Unedited | <b>CTCCACTCACTGACAGTAAAGGTCGGTATTATCTTTCCTA</b> | <b>94.860</b> |
| 1        | CTCCACTCACTGACAGT-AAGGTCGGTATTATCTTTCCTA        | 0.480         |
| 2        | CTCCACTCACTGACAGTAAAGGTCGGTATTATC-TTCCTA        | 0.197         |
| 3        | CT-CACTCACTGACAGTAAAGGTCGGTATTATCTTTCCTA        | 0.164         |
| 4        | CTCCACTCACTGACAGTAAAGGTCGGTATT-TCTTTCCTA        | 0.099         |
| 5        | CTCCACTCACTGACAGTAAAGGTCGGTA-TATCTTTCCTA        | 0.097         |
| 6        | -TCCACTCACTGACAGTAAAGGTCGGTATTATCTTTCCTA        | 0.062         |
| 7        | CTCCACTCACTGACAGTAAAGGTCGGTATTATCTTTC-A         | 0.042         |
| 8        | C-CCACTCACTGACAGTAAAGGTCGGTATTATCTTTCCTA        | 0.030         |
| 9        | CTCCACTCACTGACAGTAAAGGT-GGTATTATCTTTCCTA        | 0.026         |
| 10       | CTCCACTCACTGACAGTAAAGGTCGGTATTATCTTT-CTA        | 0.019         |
| 11       | CTCCACTCACT-ACAGTAAAGGTCGGTATTATCTTTCCTA        | 0.019         |
| 12       | CTCCACTCACTGACAGTAAAGGTC-GTATTATCTTTCCTA        | 0.016         |
| 13       | CTCCACTCACTGACAGTAAAGGTCGGTATTATCTTTC--A        | 0.014         |
| 14       | CTC--CTCACTGACAGTAAAGGTCGGTATTATCTTTCCTA        | 0.014         |
| 15       | CTCCACTCACTGACAGTAAAGGTCGGTATTATC--TCCTA        | 0.014         |
| 16       | CTCCACTCACTGACAG-AAAGGTCGGTATTATCTTTCCTA        | 0.011         |
| 17       | CTCCACTCACTGACAGT--AGGTCGGTATTATCTTTCCTA        | 0.009         |
| 18       | CTCCACTCACTG--AGTAAAGGTCGGTATTATCTTTCCTA        | 0.009         |
| 19       | CTCCACTCACTGACAGTAAAG-GTCGGTATTATCTTTCCTA       | 0.009         |
| 20       | CTCCACTCCCTGACAGT-AAGGTCGGTATTATCTTTCCTA        | 0.007         |

Expected cut site

Table S5. Top 20 edited reads in the infusion product of ZL52 at site ZJ52-CS14.

ZJ52-CS14

overall edit rate = 1.6

|          | Aligned sequence                                | %Reads        |
|----------|-------------------------------------------------|---------------|
| Unedited | <b>GACAGATCAAGCAACCCTCTTTTACTGTCACTAACTCACC</b> | <b>94.996</b> |
| 1        | GACA-ATCAAGCAACCCTCTTTTACTGTCACTAACTCACC        | 1.005         |
| 2        | GACAG-TCAAGCAACCCTCTTTTACTGTCACTAACTCACC        | 0.152         |
| 3        | GACAGATCAAGCAACCCTC-TTTACTGTCACTAACTCACC        | 0.061         |
| 4        | GACAGA-CAAGCAACCCTCTTTTACTGTCACTAACTCACC        | 0.050         |
| 5        | GACAGGATCAAGCAACCCTCTTTTACTGTCACTAACTCACC       | 0.046         |
| 6        | GACAGATCAAGCAACCCTC--TTACTGTCACTAACTCACC        | 0.041         |
| 7        | GACAGATCAAGCAACCCTCTTTTACTGTCACTAACTCACC        | 0.025         |
| 8        | GAC--ATCAAGCAACCCTCTTTTACTGTCACTAACTCACC        | 0.017         |
| 9        | GACAGATCAAGCAACCCTC---TACTGTCACTAACTCACC        | 0.015         |
| 10       | GACAGATCAAGCAACCCT-----CTGTCACTAACTCACC         | 0.014         |
| 11       | GACAGATCAAGCAACCCTCT-----CC                     | 0.012         |
| 12       | GACAGATCAAGCAACCCT-----CTAACTCACC               | 0.011         |
| 13       | GACAGAAATCAAGCAACCCTCTTTTACTGTCACTAACTCACC      | 0.010         |
| 14       | GACAGATCAAGCAACCCTCTTTTACTGTCACT-ACTCACC        | 0.009         |
| 15       | GACAGATCAAGCAACCCTCTTGATCTGTTACTGTCACTAACTCACC  | 0.009         |
| 16       | G-CA-ATCAAGCAACCCTCTTTTACTGTCACTAACTCACC        | 0.009         |
| 17       | GACAGATCAAGCAACCCTCTT---CTGTCACTAACTCACC        | 0.007         |
| 18       | -ACA-ATCAAGCAACCCTCTTTTACTGTCACTAACTCACC        | 0.005         |
| 19       | GACAGATCAAGCAACCCTCTTTTACTGTCACTAACTCA-C        | 0.005         |
| 20       | GACAG--CAAGCAACCCTCTTTTACTGTCACTAACTCACC        | 0.004         |

Expected cut site

**Table S6. Details of the transplantation and editing parameters for each edited rhesus.**

| <b>Target</b>                        | TET2 exon2                                                          | CD33                  |                         |                                                    |                         |
|--------------------------------------|---------------------------------------------------------------------|-----------------------|-------------------------|----------------------------------------------------|-------------------------|
| <b>Guide+PAM</b>                     | GGAAGGCCGTCCATTCTCAGGGG                                             | GTCAGTGACAGTACAGGAGGG |                         |                                                    |                         |
| <b>Rhesus</b>                        | <b>ZL26</b>                                                         | <b>ZL38</b>           | <b>ZL33</b>             | <b>ZJ52</b>                                        | <b>ZM36</b>             |
| <b>Date of birth</b>                 | 5/1/13                                                              | 5/10/13               | 5/9/13                  | 7/21/11                                            | 8/18/14                 |
| <b>Transplant date</b>               | 6/30/16                                                             | 9/29/16               | 2/16/17                 | 5/24/18                                            | 1/25/19                 |
| <b>Cells edited (million)</b>        | 47.5                                                                | 36                    | 37                      | 55                                                 | 32                      |
| <b>Cells re-transfused (million)</b> | 40                                                                  | 20                    | 36.9                    | 40                                                 | 45                      |
| <b>Type of gRNA used</b>             | In vitro transcribed                                                | In vitro transcribed  | In vitro transcribed    | Chemically modified                                | Chemically modified     |
| <b>Guide pool</b>                    | 20% AAVS1 pool, 80% DNMT3A exon3/19+TET2 exon1/2+ASXL1 exon1/2 pool | 100% CD33 exon2 pool  | 100% CD33 exon2 #1 only | 100% CD33 exon2 #1 only                            | 100% CD33 exon2 #1 only |
| <b>Sex</b>                           | Male                                                                | Male                  | Male                    | Female                                             | Male                    |
| <b>Comments</b>                      |                                                                     |                       |                         | Euthanized 10/24/2018 due to radiation pneumonitis |                         |

**Table S7. Coordinates of the *bona fide* off-target sites and the genes perturbed by off-target editing using the CD33 guide.**

| ISP rank | CS rank | Loci                  | Gene    | Position | Gene name                                                               | Genes within 200kbp |
|----------|---------|-----------------------|---------|----------|-------------------------------------------------------------------------|---------------------|
| ISP1     | CS1     | 19:46496828-46496849  | CD33    | exon     | On-target                                                               | 9                   |
| ISP2     | CS24    | 2:41549567-41549588   | EPS8    | exon     | epidermal growth factor receptor kinase substrate 8                     | 5                   |
| ISP8     | CS2     | 11:16366413-16366434  | SUSD3   | intron   | promoter - sushi domain containing 3 (SUSD3) is a promoter of estrogen- | 2                   |
| ISP23    | CS28    | 3:10674602-10674623   |         |          |                                                                         | 6                   |
| ISP9     | CS4     | 15:43200241-43200262  | SETD4   | intron   | SET domain containing 4                                                 | 5                   |
| ISP29    | CS1567  | 5:182408689-182408692 |         |          |                                                                         | 1                   |
| ISP30    |         | 5:61556537-61556540   | CCDC88A | intron   | coiled-coil domain containing 88A                                       | 4                   |
| ISP320   | CS355   | 1:97591083-97591104   | ANKRD17 | exon     | ankyrin repeat domain 17                                                | 2                   |
| ISP427   | CS36    | 8:26411695-26411716   | BNIP3L  | intron   | BCL2 interacting protein 3 like                                         | 4                   |
|          | CS15    | 15:39058484-39058505  |         |          |                                                                         | 2                   |
|          | CS18    | 6:55417537-55417557   | TMEFF1  | intron   | Transmembrane Protein With EGF Like And Two Follistatin Like Domains 1  | 2                   |
| ISP327   |         | 7:121963117-121963120 |         |          |                                                                         | 1                   |
| ISP383   | CS138   | 3:158401396-158401417 |         |          |                                                                         | 1                   |
|          | CS34    | 11:79245055-79245076  | GRM8    | intron   | glutamate metabotropic receptor 8                                       | 2                   |
|          | CS169   | 3:152775429-152775449 |         |          |                                                                         | 1                   |
|          | CS252   | 8:130583758-130583779 | LRRC9   | intron   | leucine rich repeat containing 9                                        | 6                   |
| ISP18    | CS3     | 9:118739404-118739425 | PLXNA4  | intron   | Plexin-A4                                                               | 6                   |
|          | CS222   | 13:56343337-56343358  | Cdcp3   | intron   | CUB domain-containing protein 3                                         | 13                  |
|          | 103     | 9:36140774-36140795   |         |          |                                                                         | 9                   |
|          | 391     | 3:177315835-177315856 | AGAP3   | intron   | ArfGAP With GTPase Domain, Ankyrin Repeat And PH Domain 3               | 5                   |

|                     |
|---------------------|
| ISP1,CS1 = Target   |
| Found by CS and ISP |
| Found by CS only    |
| Found by ISP only   |

|

**Table S8. The number of off-target sites predicted via 5 different ISP algorithms for the CD33 gRNA.**

| <b>Method</b> | <b>Total number of predicted sites</b> | <b>Number of predicted sites without duplicates</b> | <b>Notes</b> |
|---------------|----------------------------------------|-----------------------------------------------------|--------------|
| Cas-OFFinder  | 21,091                                 | 14,447                                              | No ranking   |
| CCtop         | 2,777                                  | 2,777                                               | No ranking   |
| COSMID        | 12,11                                  | 963                                                 |              |
| CRISPOR       | 252                                    | 252                                                 |              |
| E-CRISP       | 115                                    | 115                                                 |              |

Since some algorithms call the same site multiple times (often due to the site meeting both the mismatch criteria and the gap criteria) we removed duplicates from each of these counts. A duplicate was defined as sites with the exact same start sites on the same chromosome.

**Table S9. Prediction of the valid 19 off-target sites via 5 different ISP algorithms.  
Red = predicted.**

| Off-target   |        | Sequence            | PAM | CCtop     | COSMID    | CRISPOR   | E-CRISP  | Cas-<br>OFFinder |
|--------------|--------|---------------------|-----|-----------|-----------|-----------|----------|------------------|
| ISP8         | CS2    | ATCAGTGACAGTAAAGGA  | GGG |           |           |           |          |                  |
| ISP9         | CS4    | GGCAGTGACAGTAAAGGA  | CGG |           |           |           |          |                  |
| ISP2         | CS24   | GTGAGTGACAGTACAGGA  | AGG |           |           |           |          |                  |
| ISP23        | CS28   | GCCAGTGACAGAACAGGA  | GGG |           |           |           |          |                  |
|              | CS34   | GGCAGTGACAGTACAGAT  | AGG |           |           |           |          |                  |
|              | CS222  | GTCAGTAACAGCACAGTA  | AGG |           |           |           |          |                  |
| ISP30        |        | GCCAGGGACAGTACAGTA  | TGG |           |           |           |          |                  |
| ISP427       | CS36   | GGCAGTGACAATACATGA  | AGG |           |           |           |          |                  |
| ISP320       | CS355  | AGCAGTAACAGTACAGAA  | GGG |           |           |           |          |                  |
|              | CS15   | GTTAGTGACAGTAAAAGA  | GGG |           |           |           |          |                  |
|              | CS18   | GTCAGTG-CAGTACAGGA  | TGG |           |           |           |          |                  |
|              | CS252  | AGCAGGGACAGCACAGA   | GAG |           |           |           |          |                  |
|              | CS169  | GTCAGTGGCA-TACAGGT  | AAG |           |           |           |          |                  |
| ISP29        | CS1567 | GGCAGAGACAGTACAGAA  | GGG |           |           |           |          |                  |
| ISP327       |        | TTAAGTTACAGTACAGTA  | CAG |           |           |           |          |                  |
| ISP383       | CS138  | GTAAGTGACAGTACAAGG  | AGG |           |           |           |          |                  |
| ISP18        | CS3    | TGCAGTGACAGTACAGGT  | GGG |           |           |           |          |                  |
|              | CS103  | TTCAGTAACAGGGAAGGA  | AGG |           |           |           |          |                  |
|              | CS391  | GTTAGTGGCAGAACAGGGA | CGG |           |           |           |          |                  |
| <b>Sum =</b> |        |                     |     | <b>12</b> | <b>13</b> | <b>10</b> | <b>5</b> | <b>14</b>        |



**Table S10. Bona fide off-target sites within open chromatin.**

| ISP1,CS1 = Target   | Site         | Gene    | Position | ATAC-Seq |
|---------------------|--------------|---------|----------|----------|
| Found by CS and ISP | ISP1,CS1     | CD33    | exon     |          |
| Found by CS only    | ISP8,CS2     | EPS8    | exon     |          |
| Found by ISP only   | ISP9,CS4     | SUSD3   | intron   | Open     |
|                     | ISP2,CS24    |         |          |          |
|                     | ISP23,CS28   | SETD4   | intron   |          |
|                     | CS34         |         |          |          |
|                     | CS222        | CCDC88A | intron   |          |
|                     | ISP30        | ANKRD17 | exon     |          |
|                     | ISP427,CS36  | BNIP3L  | intron   |          |
|                     | ISP320,CS355 |         |          |          |
|                     | CS15         | TMEFF1  | intron   |          |
|                     | CS18         |         |          |          |
|                     | CS252        |         |          |          |
|                     | CS169        | GRM8    | intron   |          |
|                     | ISP29        |         |          | Open     |
|                     | ISP327       | LRRC9   | intron   |          |
|                     | ISP383,CS138 | PLXNA4  | intron   | Open     |
|                     | ISP18,CS3    | Cdcp3   | intron   |          |
|                     | CS103        |         |          |          |
|                     | CS391        |         |          | Open     |

**Table S11. Sequences of the primers used for translocation confirmation and the sequenced translocation.**

|                                                                                                                                                                                                                                                                                                                                            |                              |
|--------------------------------------------------------------------------------------------------------------------------------------------------------------------------------------------------------------------------------------------------------------------------------------------------------------------------------------------|------------------------------|
| <b>PRIMERS:</b>                                                                                                                                                                                                                                                                                                                            |                              |
| On-Target forward primer                                                                                                                                                                                                                                                                                                                   | TGTGGGCAGGTGAGTGA <b>CTG</b> |
| Off-target CS28/ISP23 reverse primer                                                                                                                                                                                                                                                                                                       | <b>CTACAAGTGGCGTGGAGGTTG</b> |
| <b>SEQUENCED AMPLICON:</b>                                                                                                                                                                                                                                                                                                                 |                              |
| <p> TGTGGGCAGGTGAGTGA<b>CTG</b>CTGGGAGGGGGGTTGTCGGGCTGGGC<br/> CAAGCTGACCCTCATT<b>TCC</b>CACAGGGGCCCTGGCTATGGATCCAAGAG<br/> <b>TCAGGCTGG</b>GGGCAGGACTTCATTCACTTATGGGTCACACAGGCTTGT<br/> CATGATGATAACATTCAGTCCTTGCCTGCAGAGAGCACCCACCCCTCGT<br/> GCTTTTTCTTCTCAGCTCCTCCTCCTTTCTTATTACCTGGTCGGCTTC<br/> CACACAGGAGCTACAAGTGGCGTGGAGGTTG </p> |                              |

On-target site/Chromosome 19: Green. Off-target site/Chromosome3: Red. Shared: Grey.

**Table S12. Monoclonal antibody clones used for flow-cytometry sorting.**

| Cell | Marker         | Fluorochrome | Clone  | Cat no.                     |
|------|----------------|--------------|--------|-----------------------------|
| NK   | CD16           | BV605        | 3G8    | BioLegend<br>(302040)       |
| NK   | CD159a (NKG2A) | APC          | Z199   | Beckman Coulter<br>(A60797) |
| T    | CD3            | BV786        | SP34-2 | BD Biosciences<br>(563918)  |
| B    | CD20           | APC-Cy7      | L27    | BD Biosciences<br>(335794)  |

**Table S13. Adaptor sequences for primers of targeted Illumina sequencing library prep.**

|                                          |                                 |
|------------------------------------------|---------------------------------|
| Adaptor sequence for the forward primers | ACACTCTTCCCTACACGACGCTCTCCGATCT |
| Adaptor sequence for the reverse primers | GACTGGAGTTCAGACGTGTGCTCTCCGATCT |

**Table S14. Sequences of the oligos used for CAST-Seq on ZJ52.**

|                              |                                                             |
|------------------------------|-------------------------------------------------------------|
| <b>Adaptor</b>               |                                                             |
| Positive strand linker oligo | GTAATACGACTCACTATAGGGCTCCGCTTAAGGGACT                       |
| Negative strand linker oligo | P-GTCCCTTAAGCGGAGC-NH3                                      |
|                              |                                                             |
| <b>PCR I</b>                 |                                                             |
| Initial linker prey primers  | GTAATACGACTCACTATAGGGC                                      |
| Initial CD33 bait            | CAAGCTGACCCTCATTTC                                          |
| Initial CD33 decoy forward   | CAGTTCATGGTACTGGTTCC                                        |
| Initial CD33 decoy reverse   | GGTACGGGATGGAAGAAAG                                         |
|                              |                                                             |
| <b>PCR II</b>                |                                                             |
| Nested linker prey primers   | ACACTCTACACTCTTTCCCTACACGACGCTCTTCCGATCTAGGGCTCCGCTTAAGGGAC |
| Nested CD33 bait nested      | GACTGGAGTTCAGACGTGTGCTCTTCCGATCTGGATCCAAGAGTCAGGCTGG        |
